# Supplementary material for: Increasing leaf hydraulic conductance with transpiration rate minimizes the water potential drawdown from stem to leaf
Source: PubMed Central journal article supplement (PMC4339593; doi:10.1093/jxb/eru481), 2014-12-29
Supplement: supp_eru481_jexbot131904_file001.pdf [file supp_eru481_jexbot131904_file001.pdf]

**Increasing leaf hydraulic conductance with transpiration rate minimizes the water potential drawdown from stem to leaf.**

Kevin A. Simonin, Emily Burns, Brendan Choat, Margaret M. Barbour, Todd E. Dawson and Peter J. Franks

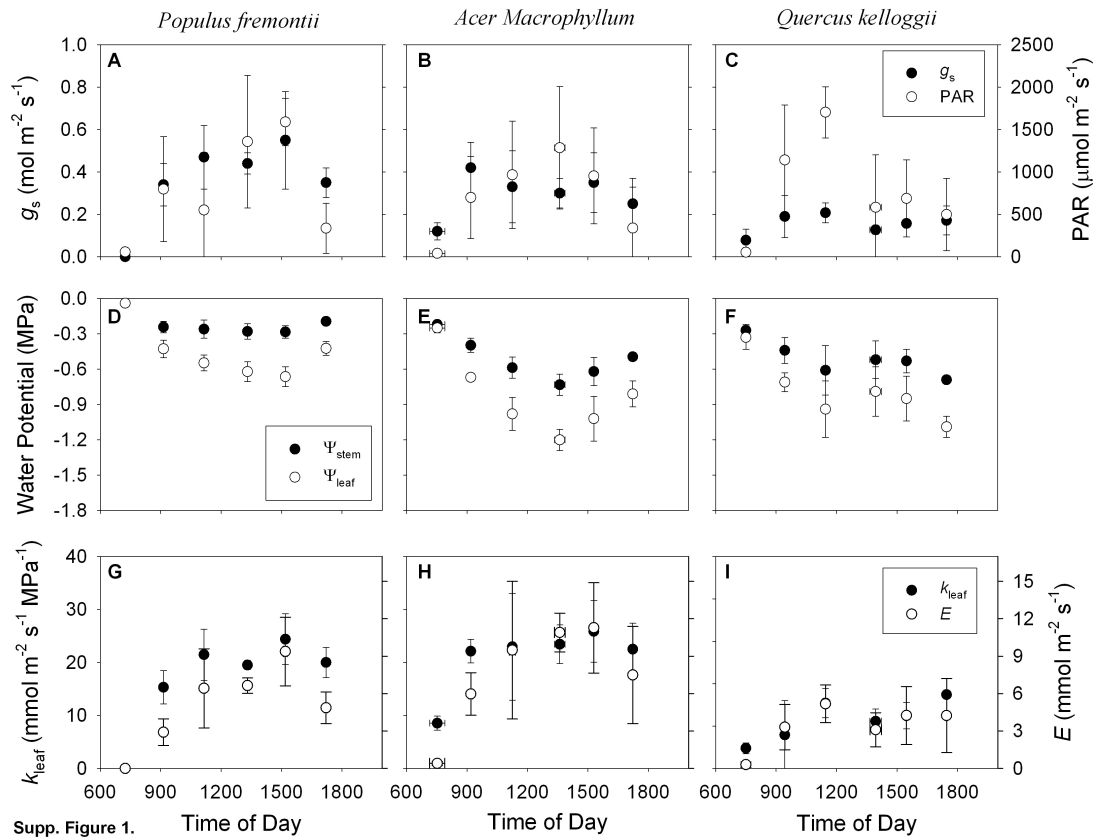

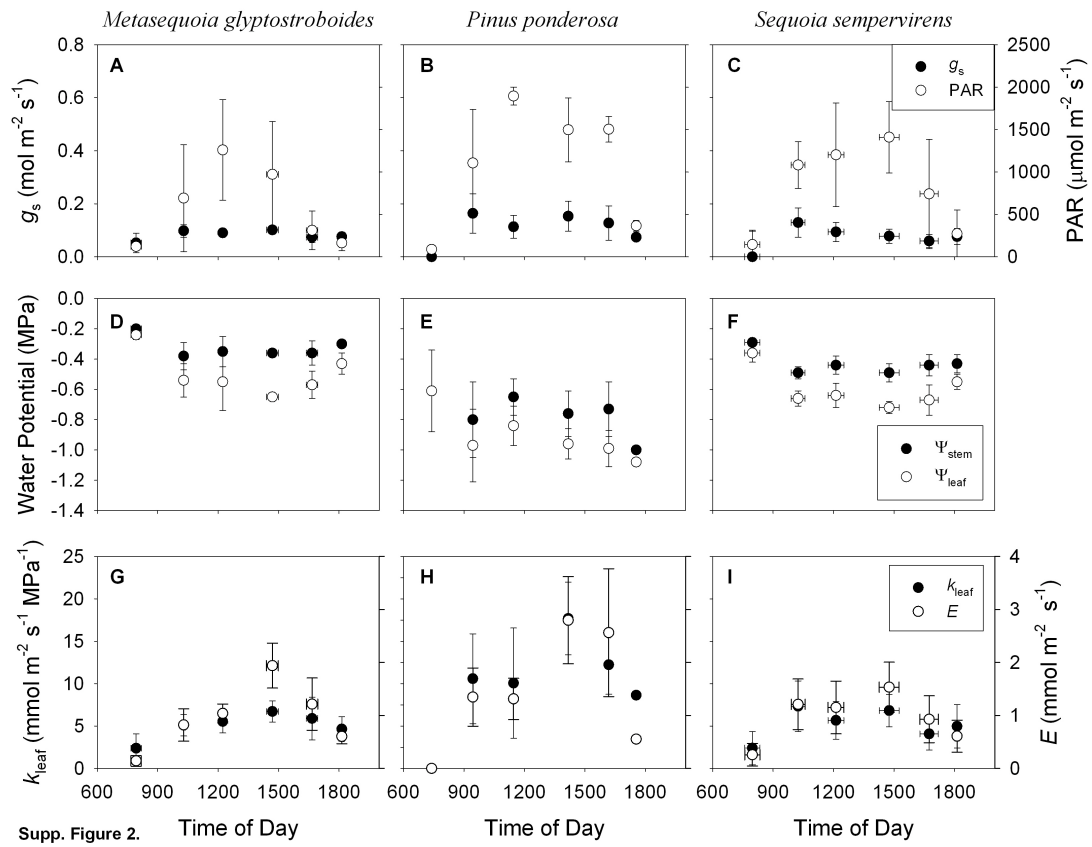

**Supplemental Figure 1.** Diurnal variation in photosynthetically active radiation (PAR,  $\mu\text{mol m}^{-2} \text{s}^{-1}$ ) stomatal conductance ( $g_s$ ,  $\text{mol m}^{-2} \text{s}^{-1}$ ), stem and leaf water potential ( $\Psi_{\text{stem}}$  and  $\Psi_{\text{leaf}}$ , MPa), leaf hydraulic conductance ( $k_{\text{leaf}}$ ,  $\text{mmol m}^{-2} \text{s}^{-1}$ ) and transpiration rate ( $E$ ,  $\text{mmol m}^{-2} \text{s}^{-1}$ ) for three angiosperm species growing in a common garden. Species are sorted by increasing leaf life span: (a, d, g) *Populus fremontii*, (b, e, h) *Acer macrophyllum*, and *Quercus kelloggii* (c, f, i).

**Supplemental Figure 2.** Diurnal variation in photosynthetically active radiation (PAR,  $\mu\text{mol m}^{-2} \text{s}^{-1}$ ) stomatal conductance ( $g_s$ ,  $\text{mol m}^{-2} \text{s}^{-1}$ ), stem and leaf water potential ( $\Psi_{\text{stem}}$  and  $\Psi_{\text{leaf}}$ , MPa), leaf hydraulic conductance ( $k_{\text{leaf}}$ ,  $\text{mmol m}^{-2} \text{s}^{-1}$ ) and transpiration rate ( $E$ ,  $\text{mmol m}^{-2} \text{s}^{-1}$ ) for three gymnosperm species growing in a common garden. Species are sorted by increasing leaf life span: (a, d, g) *Metasequoia glyptostroboides*, (b, e, h) *Pinus ponderosa*, and (c, f, i) *Sequoia sempervirens*.
